# Supplementary material for: Novel Fluoroindenoisoquinoline Non-Camptothecin Topoisomerase I Inhibitors
Source: Oxford University Press journal article supplement (doi:10.1158/1535-7163.mct-18-0028), 2018-05-10
Supplement: 15357163mct180028-sup-195181_2_supp_4732878_p8630c.xlsx [file 15357163mct180028-sup-195181_2_supp_4732878_p8630c.xlsx]

## Sheet: Sheet1
	Table S3: Pharmacokinetic of LMP135, LMP134 and LMP517
	Cmpd	Dose	Cmax (SE*)	AUC** all (SE)	Vz	CL/F	T1/2 (hr)
		mg/kg	ng/mL	ng/mL	mL	mL/hr	hr
	LMP135	20	1150 (47.3)	3528 (285)	452	128	2.46
	LMP134	30	2492 (148)	5779 (363)	182.8	131.9	0.96
	LMP517	30	1616 (87.0)	4725 (217)	730	105.9	4.78
	* SE: standard error, based on triplicate values at each time point
	** AUC standard error caclulated using the Bailer's Method
