# Supplementary material for: Novel Fluoroindenoisoquinoline Non-Camptothecin Topoisomerase I Inhibitors
Source: Oxford University Press journal article supplement (doi:10.1158/1535-7163.mct-18-0028), 2018-05-10
Supplement: 15357163mct180028-sup-195181_2_supp_4732904_p8630c.xlsx [file 15357163mct180028-sup-195181_2_supp_4732904_p8630c.xlsx]

## Sheet: Supplementary table S1
	Table S1: A, Correlation of fluoroindenoisoquinolines with TOP1 inhibitors and example of negative correlation with Paclitaxel and Erlotinib. B, Corresponding p value.
	A
		Topotecan	LMP744	LMP776	LMP517	LMP134	LMP135	Paclitaxel	Erlotinib
	Topotecan	1	0.805	0.738	0.687	0.884	0.892	0.175	-0.113
	LMP744	0.805	1	0.691	0.722	0.786	0.78	0.159	-0.0447
	LMP776	0.738	0.691	1	0.728	0.744	0.817	0.167	-0.12
	LMP517	0.687	0.722	0.728	1	0.78	0.789	0.178	-0.128
	LMP134	0.884	0.786	0.744	0.78	1	0.906	0.0229	0.0167
	LMP135	0.892	0.78	0.817	0.789	0.906	1	0.0454	-0.0705
	Paclitaxel	0.175	0.159	0.167	0.178	0.0229	0.0454	1	-0.419
	Erlotinib	-0.113	-0.0447	-0.12	-0.128	0.0167	-0.0705	-0.419	1
	B
		Topotecan	LMP744	LMP776	LMP517	LMP134	LMP135	Paclitaxel	Erlotinib
	Topotecan	0	9.17e-15	3.76e-11	3.67e-09	1.84e-19	3.18e-20	0.182	0.394
	LMP744	9.17e-15	0	1.98e-09	2.41e-10	7.51e-13	1.36e-12	0.226	0.737
	LMP776	3.76e-11	1.98e-09	0	2.07e-10	7.34e-11	2.74e-14	0.209	0.369
	LMP517	3.67e-09	2.41e-10	2.07e-10	0	3.56e-12	1.42e-12	0.186	0.341
	LMP134	1.84e-19	7.51e-13	7.34e-11	3.56e-12	0	7.74e-22	0.867	0.903
	LMP135	3.18e-20	1.36e-12	2.74e-14	1.42e-12	7.74e-22	0	0.74	0.606
	Paclitaxel	0.182	0.226	0.209	0.186	0.867	0.74	0	0.000966
	Erlotinib	0.394	0.737	0.369	0.341	0.903	0.606	0.000966	0
